# Supplementary material for: Effect of fluorination on the performance of poly(thieno[2,3-f]benzofuran-co-benzothiadiazole) derivatives
Source: Royal Society of Chemistry journal article supplement (doi:10.1039/c5ra03405a), 2015-01-01
Supplement: c5ra03405a1.pdf [file c5ra03405a1.pdf]

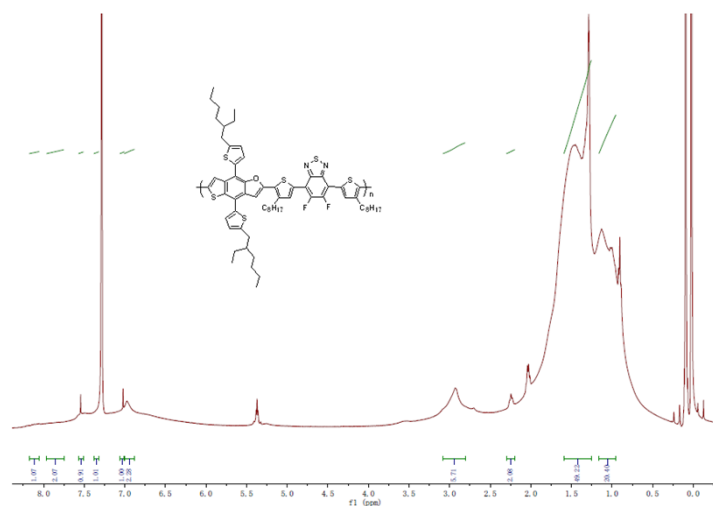

Figure S1.  $^1\text{H-NMR}$  of three polymers

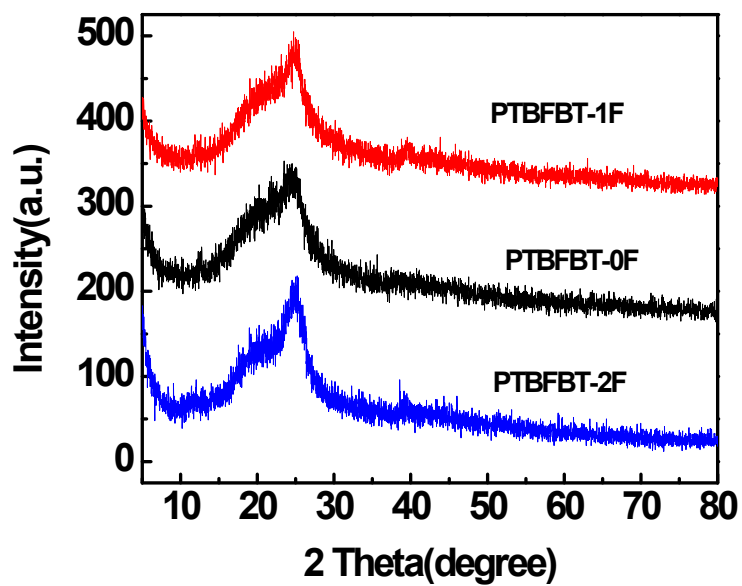

Figure S2. X-ray diffraction patterns of three polymers

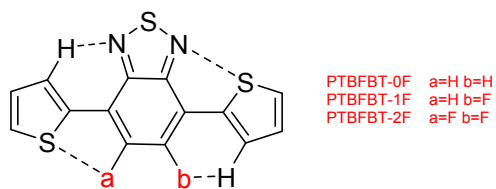

Figure S3. Noncovalent attractive interactions within the polymer chain

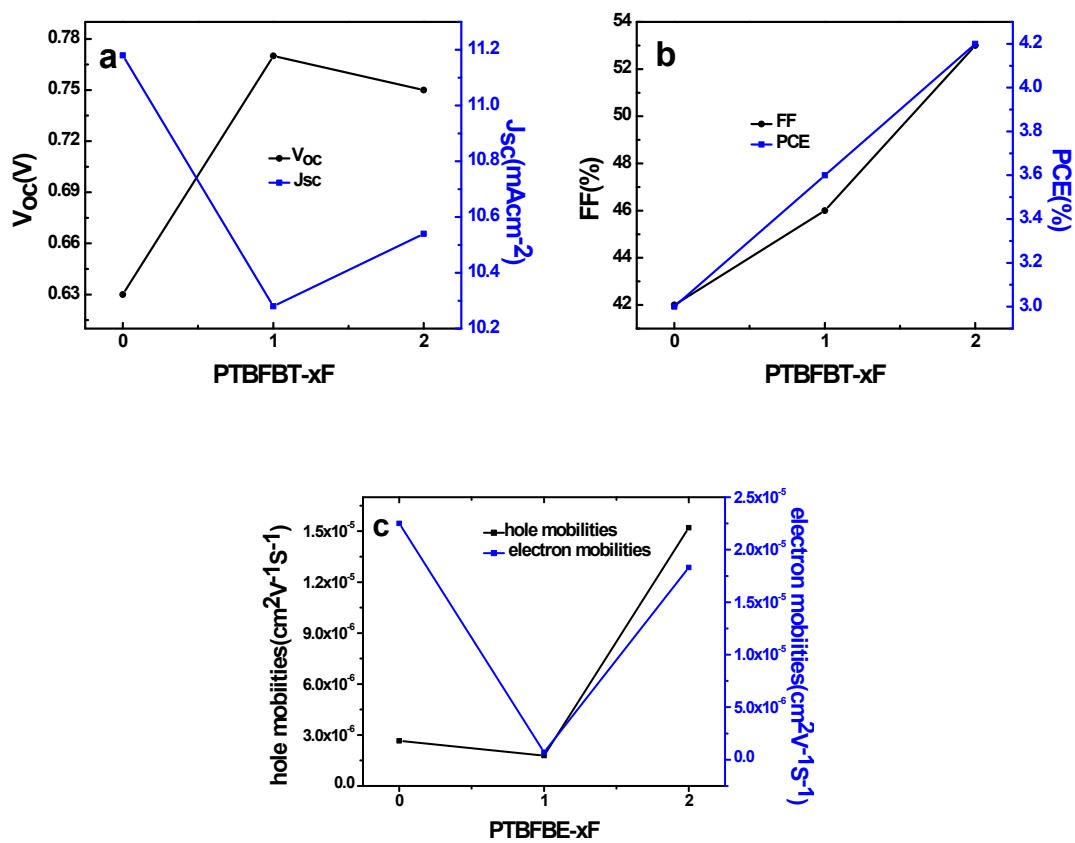

**Figure S4.** The correlation between PTBFBT-xF and (a)  $V_{oc}$ ,  $J_{sc}$  (b)  $FF$ , PCE (c) hole and electron mobilities

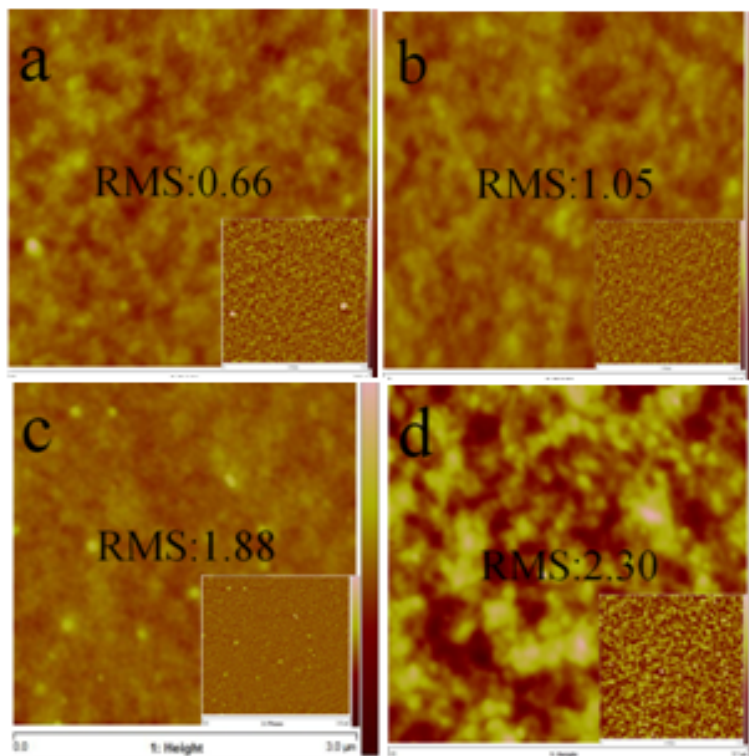

**Figure S5.** AFM images ( $3\mu\text{m} \times 3\mu\text{m}$ ) of TBFBT-0F/PC<sub>71</sub>BM films (a), PTBFBT-1F/PC<sub>71</sub>BM films (b), PTBFBT-2F/PC<sub>71</sub>BM films without ZrAcac (c) and with ZrAcac (d). Inserts are phase images.
